# Supplementary material for: Identification and characterization of domains responsible for self-assembly and cell wall binding of the surface layer protein of Lactobacillus brevis ATCC 8287
Source: PubMed Central journal article supplement (PMC2571106; doi:10.1186/1471-2180-8-165), 2008-10-01
Supplement: 1471-2180-8-165-S1.pdf [file 1471-2180-8-165-S1.pdf]

```

          10          20          30          40          50          60          70          80          90          100         110         120
          |          |          |          |          |          |          |          |          |          |          |
SlpC_mature ASKTKVTSADVTLKTAAESRNVEATGTNALYSKPGTVKGAKLVASKTTMKKMANSSKKSADYFRAYRVAKTTRGTVYYKVMVSMGDKYRGYVYGGRSV-----KAFAGGIKKAATTKSATMPS
Q03NT3      TTYTKVTSADVTLKTAAESRNVEATGTNALYSKPGTVKGAKLVASKTTMKKMANSSKKSADYFRAYRVAKTTRGTVYYKVMVSMGDKYRGYVYGGRSV-----KAFAGGIKKAATTKSATMPS
SlpA_mature KSYATAGAYSTLKTDAATRNVVEATGTNALYTKPGTVKGAKVVASKATMAKLAASSKKSADYFRAYGVKTTNRGVSYYRVVMTMDGKYRGYVYGGKSD-----TAFAGGIKSAETTTKADMPA
SlpB_mature KSAAKVTSDEVLTDDATKRVNLTGTNALYSKPGTVKGAKVVATTTTAKNLNKSSTTSRENFRAYRVAKTNRGSIYYKVVSYNKAYRGWVYGGKSD-----TAFAGGLTSYDTFKEGTLTA
SlpD_mature SKIKQVGSSTNLEPTTAYIRNYKATGSNAIYNKPGKLSGSKVVASASTAKAQS-----VLRGYKVAKL SNKSYMKVVSFDGRYRGIYVGGKKNPVNPFKKGVGGGLTYLSTTTSTSLTN
Q03P39      SKIKQVGSSTNLEPTTAYIRNYKATGSNAIYNKPGKLSGSKVVASASTAKAQS-----VLHGKVAKL SNKSYMKVVSFDGRYRGIYVGGKKNPVNPFKKGVGGGLTYLSTTTSTSLTN
          .   .   :   *   *   *   *   *   *   *   *   *   *   *   *   *   *   *   *   *   *   *   *   *   *   *   *   *   *   *   *   *   *   *   *
Prim.cons.  2S23KV2SD2TLKT3A22RNVEATGTNA2YSKPGTVKGAKVVASKTT2KK3ANSKKSADYFRAYRVAKT3RGSVYYKVVSMGDKYRGYVYGGKS3PVNPFKAFAGG223A2TT2SAT223

```

```

          130         140         150         160         170         180         190         200         210         220         230         240
          |          |          |          |          |          |          |          |          |          |          |
SlpC_mature N--TTMYFKTP----GKSNVSWTAPNNTQYKASKVVKDITTYANDALVVTDAARKTREGSLYYYVT--DAAHPEVNGWVYAKGLTTTKPTTDFNDKTDVVKVNLKNADGVVITKTAILSKL
Q03NT3      N--TTMYFKTP----GKSNVSWTAPNNTQYKASKVVKDITTYANDALVVTDAARKTREGSLYYYVT--DAAHPEVNGWVYAKGLTTTKPTTDFNDKTDVVKVNLKNADGVVITKTAILSKL
SlpA_mature R--TTGFYLTD----TSKNTLWLTAPKYTQYKASKVSLYG-VAKDTKFTVDQAATKTREGSLYHYVT--ATNGSGISGWIYAGKGFSTTATGTQVLGGLSTDKSVTATNDNSVKIVYRTTD
SlpB_mature DQ-KSGNYKLANPGKTEAGLTYKQPAWTQYKIGKTIADTTAYKDATFSVDKVGTRTREGDTWVHVVNQNTADTKADGWILLSNLTQTNAFNE----ASQVKVNIINNLKGETLKSFNYNVG
SlpD_mature NDKKDLSSFAPK----GTDTQIYKAPKGSQYKVGAAVKDITTDYKGHLVASKAAMNDMDGQKWLYVS-DVTEPTNASGWVLASQLTDYVAPKAP-----VSVGNDQTTVTKNWQREFY
Q03P39      NDKKDLSSFAPK----GTDTQIYKAPKGSQYKVGAAVKDITTDYKGHLVASKAAMNDMDGQKWLYVS-DVTEPTNASGWVLASQLTDYVAPKAP-----VSVGNDQTTVTKNWQREFY
          .   .   :   .   *   :   *   *   *   .   .   .   .   .   .   .   .   .   .   .   .   .   .   .   .   .   .   .   .   .   .   .   .
Prim.cons.  NDK2T32FKTPNPGKG22N222APK2TQYKA2KVVKDITTY2YK32KLVV3KAA3KTREGSL2YYVTND2TA2T2ASGWV2AS2LT2T2AT22PFNDKTDVVKV2V2N22G2V2K22QR2F2

```

```

          250         260         270         280         290         300         310         320         330         340         350         360
          |          |          |          |          |          |          |          |          |          |          |
SlpC_mature DANGG--TTSTVTGTA VGS SAKKQANDAWGKTVLTG-TGYKYASADSSNVSALTNAKTGDITLIVTKNEVVDTPITFYATTNSA---DLSQKATVLSVYKNETNTPASKD TVVFPVTSAT
Q03NT3      AANGGSTVSTATGTA VGS TAATTKADNAWGKTVLAG-TGYSYARSDSGNLAALAAAKTGDITLIVTKNTVSDTPITFYATTNSS---DLSQAATELKAYK-EGSTTAANDTVVFPVAVSAT
SlpA_mature GTQVG--SNTWVTS TDGTKAGSKVSDKAADQTAL EAYINANKPSGYTVTNPNAAADATYGNTVYATV SQAATSKVALKVS GTPVTT---ALTTADANDKVAA--NDTTANGSSVAGSTVYA-
SlpB_mature TTATN--TNAADNTVYDSTATPTKFADGFAATVKNALAGTGYTV DGTNALNRVANLKS GSTLTIYATEGTQKPSTVSVFAQY PDTPSINQVKVATADQTKDGVADAATAQNLI NQPAATTL
SlpD_mature NPATG-----TKAYSFDNLNLP LLGTS GGSNVNWTAVKKFNSDATVKGDKKD VVPADTLATAFKNSGLSTVYMKVTP TLLAR-----IPGGLLDKIDSYSGLYMKFDLDM DNIPTTTH
Q03P39      NPATG-----TKAYSFDNLNLP LLGTS GGSNVNWTAVKKFNSDATVKGDKKD VVPADTLATAFKNSGLSTVYMKVTP TLLAR-----IPGGLLDKIDSYSGLYMKFDLDM DNIPTTTH
          .   .   .   .   .   .   .   .   .   .   .   .   .   .   .   .   .   .   .   .   .   .   .   .   .   .   .   .   .   .   .   .
Prim.cons.  N3ATGSTNSTVT2TY22DA2N3222A2G2TVLN3TTG2K222SD3T22G22ADAK2GD TLT22VT222S2V22KV2AT2222PSIDL222ATL DK222Y2G2T2A2D22V22P3VT22

```

```

          370         380         390         400         410         420         430         440         450         460
          |          |          |          |          |          |          |          |          |          |
SlpC_mature FDGTKDASFTAGDLVAYLT-TSKLNLVLYTPTYT KT-TGSSDKYYTEYTLV SALPGTYGTTTKAFYVASEKTGN-----SPMSAPVVSGTTGYHTNN-----
Q03NT3      FSGTKNASFTAGDLVAYLT-TSKLNLVDTPNYNK--AGSSDKYYTEYTLV SALPGTYGVTTTKAFYVASEKTGN-----SPVSAPVVSGTTGYHTNK-----
SlpA_mature -AGTKLAQLT TDLTG EKQGVVTLTAIDT DLEDAT-FTGTTTTYSDLGKAYHYTYT YNKDSAASSNASTQFGSNV-----TGTLTATLVMGKSTATANGTTWFN
SlpB_mature FTGVEGKSFTATEALAYLNGNASMKKILTSPSWTETS GSTSVTYQWVLT P SQAFAQQY GSPFSAIY TAKKTVVPATGSNDNNTDNPIANGVVSSTPTANPTD TTK--
SlpD_mature YGDQLKLAYKLDNTNLYYK PVI SLGGLTNTNADG-----YAALPVQLNAMNTLWGLLYQ-----
Q03P39      YGDQLKLAYKLDNTNLYYK PVI SLGGLTNTNADG-----YAALPVQLNAMNTLWGLLYQ-----
          .   .   .   .   .   .   .   .   .   .   .   .   .   .   .   .   .   .   .   .   .   .   .   .   .   .   .   .   .   .
Prim.cons.  FGGTKKASFTAD2T2AYL2PV2SL22LTTPN2D2TS4GSSD2YY223T222A22GTYGL222AFYVASEKTGN22GSNDNNT2SP4SAPVVSGTT224TN4TT2FN

```
